# Supplementary material for: How do authors of systematic reviews deal with research malpractice and misconduct in original studies? A cross-sectional analysis of systematic reviews and survey of their authors
Source: PubMed Central journal article supplement — BMJ Open. 2016 Mar 2;6(3):e010442. doi: 10.1136/bmjopen-2015-010442 (PMC4785311; doi:10.1136/bmjopen-2015-010442), 2016-03-02
Supplement: bmjopen-2015-010442supp_tables.pdf [file bmjopen-2015-010442supp_tables.pdf]

Appendix Table 1A

|                                    | 1rst Author | Title                                                                                                                                           | Country of affiliation | Nb co-authors | Protocol accessibility | Funding of the review        | COI of reviewers | Language limitation | Nb studies included | Designs examined | Procedure rating £ |
|------------------------------------|-------------|-------------------------------------------------------------------------------------------------------------------------------------------------|------------------------|---------------|------------------------|------------------------------|------------------|---------------------|---------------------|------------------|--------------------|
| <b>Annals of internal Medicine</b> |             |                                                                                                                                                 |                        |               |                        |                              |                  |                     |                     |                  |                    |
| A1§                                | Boland MV   | Comparative Effectiveness of Treatments for Open-Angle Glaucoma: A Systematic Review for the U.S. Preventive Services Task Force                | USA                    | 10            | No                     | Perceived, role described    | Detailed         | No                  | 379                 | Various          | 0/0/2/0/0/0        |
| A2°                                | Chou R      | Blood Tests to Diagnose Fibrosis or Cirrhosis in Patients With Chronic Hepatitis C Virus Infection A Systematic Review                          | USA                    | 2             | No                     | Perceived, no role           | Detailed**       | English             | 172                 | Diagnostic only  | 0/0/1/0/0/0        |
| A3°                                | Chou R      | Comparative Effectiveness of Antiviral Treatment for Hepatitis C Virus Infection in Adults: A Systematic Review                                 | USA                    | 6             | No                     | Perceived, role described    | Detailed**       | English             | 90                  | Various          | 1/0/0/1/0/0        |
| A4°                                | Chou R      | Screening for Hepatitis C Virus Infection in Adults: A Systematic Review for the U.S. Preventive Services Task Force                            | USA                    | 5             | No                     | Perceived, role described    | Detailed         | English             | 16 (166)            | Various          | 1/0/0/0/0/0        |
| A5°                                | Cottrell EB | Reducing Risk for Mother-to-Infant Transmission of Hepatitis C Virus: A Systematic Review for the U.S. Preventive Services Task Force           | USA                    | 5             | No                     | Perceived, role not reported | Detailed**       | English             | 18                  | Various          | 1/0/1/0/0/0        |
| A6                                 | Donovan L   | Screening Tests for Gestational Diabetes: A Systematic Review for the U.S. Preventive Services Task Force                                       | Canada                 | 6             | No                     | Perceived, no role           | Detailed         | English             | 51                  | Various          | 1/0/1/0/0/0        |
| A7§                                | Fink HA     | Medical Management to Prevent Recurrent Nephrolithiasis in Adults: A Systematic Review for an American College of Physicians Clinical Guideline | USA                    | 10            | No                     | Perceived, role described    | Detailed         | English             | 28                  | RCTs only        | 1/0/0/0/0/0        |
| A8§                                | Fu R        | Effectiveness and Harms of Recombinant Human Bone Morphogenetic Protein-2 in Spine Fusion A Systematic Review and Meta-analysis                 | USA                    | 7             | Yes                    | Perceived, role described    | Detailed**       | English             | 44                  | Various          | 1/2/1/1/1/0        |
| A9°                                | Greer N     | Advanced Wound Care Therapies for Nonhealing Diabetic, Venous, and Arterial Ulcers A Systematic Review                                          | USA                    | 7             | No                     | Perceived, role described    | Detailed**       | English             | 59                  | RCTs only        | 0/0/1/1/0/0        |

|      | 1rst Author      | Title                                                                                                                                                                                                                            | Country of affiliation | Nb co-authors | Protocol accessibility | Funding of the review     | COI of reviewers | Language limitation | Nb studies included | Designs examined | Procedure rating £ |
|------|------------------|----------------------------------------------------------------------------------------------------------------------------------------------------------------------------------------------------------------------------------|------------------------|---------------|------------------------|---------------------------|------------------|---------------------|---------------------|------------------|--------------------|
| A10  | Hartling L       | Benefits and Harms of Treating Gestational Diabetes Mellitus: A Systematic Review and Meta-analysis for the U.S. Preventive Services Task Force and the National Institutes of Health Office of Medical Applications of Research | Canada                 | 6             | No                     | Perceived, role described | Detailed         | English             | 11                  | Various          | 0/0/2/0/0/0        |
| A11° | Hollingsworth JM | Determining the Noninfectious Complications of Indwelling Urethral Catheters. A Systematic Review and Meta-analysis                                                                                                              | USA                    | 8             | No                     | Perceived, no role        | Detailed         | No                  | 37                  | Various          | 1/1/1/0/0/0        |
| A12° | Humphrey LL      | Screening for Lung Cancer With Low-Dose Computed Tomography: A Systematic Review to Update the U.S. Preventive Services Task Force Recommendation                                                                                | USA                    | 9             | No                     | Perceived, role described | Detailed         | English             | 67                  | Various          | 0/0/1/1/0/0        |
| A13  | Hussey PS        | The Association Between Health Care Quality and Cost. A Systematic Review                                                                                                                                                        | USA                    | 3             | No                     | Perceived, role described | Detailed**       | English             | 61                  | quality/costs    | 0/0/0/0/0/-        |
| A14  | Jackson GL       | The Patient-Centered Medical Home A Systematic Review                                                                                                                                                                            | USA                    | 12            | No                     | Perceived, role described | Detailed**       | English             | 60                  | Various          | 1/0/1/0/1/0        |
| A15  | Kansagara D      | Treatment of Anemia in Patients With Heart Disease. A Systematic Review                                                                                                                                                          | USA                    | 6             | No                     | Perceived, no role        | Detailed**       | English             | 55                  | Various          | 1/2/1/0/0/0        |
| A16° | Kramer CK        | Are Metabolically Healthy Overweight and Obesity Benign Conditions?. A Systematic Review and Meta-analysis                                                                                                                       | Canada                 | 3             | Yes                    | Perceived, no role        | Detailed**       | No                  | 12                  | Various          | 1/2/1/0/0/0        |
| A17° | Kwan JL          | Medication Reconciliation During Transitions of Care as a Patient Safety Strategy. A Systematic Review                                                                                                                           | Canada                 | 4             | No                     | Perceived, no role        | Detailed         | English             | 18                  | Various          | 0/2/1/0/0/0        |
| A18§ | Lee M            | Risk–Benefit Profile of Long-Term Dual- Versus Single-Antiplatelet Therapy Among Patients With Ischemic Stroke A Systematic Review and Meta-analysis                                                                             | Taiwan                 | 6             | No                     | Perceived, no role        | Detailed**       | No                  | 7                   | RCTs only        | 1/0/2/0/0/0        |

|      | 1rst Author      | Title                                                                                                                                  | Country of affiliation | Nb co-authors | Protocol accessibility | Funding of the review     | COI of reviewers | Language limitation | Nb studies included | Designs examined | Procedure rating £ |
|------|------------------|----------------------------------------------------------------------------------------------------------------------------------------|------------------------|---------------|------------------------|---------------------------|------------------|---------------------|---------------------|------------------|--------------------|
| A19§ | Lin JS           | Screening for Cognitive Impairment in Older Adults: A Systematic Review for the U.S. Preventive Services Task Force                    | USA                    | 5             | No                     | Perceived, role described | Detailed         | English             | 311                 | Various          | 2/0/1/1/0/0        |
| A20  | Lubick Goldzweig | Electronic Patient Portals: Evidence on Health Outcomes, Satisfaction, Efficiency, and Attitudes A Systematic Review                   | USA                    | 8             | No                     | Perceived, role described | Detailed**       | English             | 46                  | Various          | 0/0/0/0/0/0        |
| A21° | McDonald KM      | Patient Safety Strategies Targeted at Diagnostic Errors A Systematic Review                                                            | USA                    | 7             | No                     | Perceived, no role        | Detailed         | Not specified       | 109                 | Various          | 1/0/1/0/0/0        |
| A22° | Miake-Lye IM     | Inpatient Fall Prevention Programs as a Patient Safety Strategy. A Systematic Review                                                   | USA                    | 4             | No                     | Perceived, no role        | Detailed         | Not specified       | 21                  | Various          | 0/0/0/0/0/0        |
| A23  | Navarese EP      | Optimal Timing of Coronary Invasive Strategy in Non-ST-SegmentElevation Acute Coronary Syndromes A Systematic Review and Meta-analysis | Poland                 | 12            | No                     | None perceived            | Detailed         | Not specified       | 11                  | Various          | 1/0/0/0/0/0        |
| A24° | Nelson HD        | Use of Medications to Reduce Risk for Primary Breast Cancer: A Systematic Review for the U.S. Preventive Services Task Force           | USA                    | 4             | No                     | Perceived, role described | Detailed         | English             | 89                  | Various          | 1/2/1/0/0/0        |
| A25° | O'Connor E       | Screening for and Treatment of Suicide Risk Relevant to Primary Care: A Systematic Review for the U.S. Preventive Services Task Force  | USA                    | 5             | No                     | Perceived, role described | Detailed         | English             | 159                 | Various          | 1/1/0/0/0/0        |
| A26° | Raman G          | Management Strategies for Asymptomatic Carotid Stenosis. A Systematic Review and Meta-analysis                                         | USA                    | 9             | No                     | Perceived, role described | Detailed**       | English             | 56                  | Various          | 1/2/0/1/0/0        |
| A27° | Rennke S         | Hospital-Initiated Transitional Care Interventions as a Patient Safety Strategy. A Systematic Review                                   | USA                    | 6             | No                     | Perceived, no role        | Detailed         | English             | 47                  | RCTs only        | 0/0/1/0/0/0        |
| A28° | Reston JT        | In-Facility Delirium Prevention Programs as a Patient Safety Strategy A Systematic Review                                              | USA                    | 2             | No                     | Perceived, no role        | Detailed         | Not specified       | 19                  | Various          | 0/0/0/0/0/0        |
| A29  | Richardson K     | Statins and Cognitive Function A Systematic Review                                                                                     | USA                    | 9             | No                     | None perceived            | Detailed         | Not specified       | 57                  | Various          | 0/0/1/0/0/0        |
| A30° | Schmidt E        | Simulation Exercises as a Patient Safety Strategy A Systematic Review                                                                  | USA                    | 4             | No                     | Perceived, role described | Detailed         | English             | 38                  | Various          | 1/0/1/0/0/0        |

|            | 1rst Author     | Title                                                                                                                                                            | Country of affiliation | Nb co-authors | Protocol accessibility | Funding of the review        | COI of reviewers | Language limitation | Nb studies included | Designs examined | Procedure rating £ |
|------------|-----------------|------------------------------------------------------------------------------------------------------------------------------------------------------------------|------------------------|---------------|------------------------|------------------------------|------------------|---------------------|---------------------|------------------|--------------------|
| A31°       | Selph SS        | Behavioral Interventions and Counseling to Prevent Child Abuse and Neglect: A Systematic Review to Update the U.S. Preventive Services Task Force Recommendation | USA                    | 4             | No                     | Perceived, role described    | Detailed         | English             | 11                  | Various          | 1/2/1/0/0/0        |
| A32°       | Shekelle PG     | Nurse–Patient Ratios as a Patient Safety Strategy. A Systematic Review                                                                                           | USA                    | 1             | No                     | Perceived, no role           | Detailed         | English             | 17                  | Various          | 0/0/0/0/0/0        |
| A33°       | Sullivan N      | Preventing In-Facility Pressure Ulcers as a Patient Safety Strategy A Systematic Review                                                                          | USA                    | 2             | No                     | Perceived, no role           | Detailed         | Other               | 51                  | Various          | 0/0/1/1/0/0        |
| A34°       | Sumamo Scheller | Lifestyle Interventions for Patients With and at Risk for Type 2 Diabetes A Systematic Review and Meta-analysis                                                  | Canada                 | 5             | No                     | Perceived, role described    | Detailed         | English             | 20                  | RCTs only        | 1/2/1/1/0/0        |
| A35        | Tangri N        | Risk Prediction Models for Patients With Chronic Kidney Disease A Systematic Review                                                                              | Canada                 | 10            | No                     | None perceived               | Detailed         | English             | 13                  | Cohort only      | 0/0/1/0/0/0        |
| A36§       | Uhlig K         | Self-Measured Blood Pressure Monitoring in the Management of Hypertension. A Systematic Review and Meta-analysis                                                 | USA                    | 5             | No                     | Perceived, role described    | Detailed**       | No                  | 55                  | Various          | 0/0/1/0/0/0        |
| A37°       | Vasilakou D     | Sodium–Glucose Cotransporter 2 Inhibitors for Type 2 Diabetes. A Systematic Review and Meta-analysis                                                             | Greece                 | 9             | No                     | None perceived               | Detailed         | No                  | 58                  | RCTs only        | 2/2/1/1/0/0        |
| A38°       | Weaver SJ       | Promoting a Culture of Safety as a Patient Safety Strategy. A Systematic Review                                                                                  | USA                    | 6             | No                     | Perceived, no role           | Detailed         | English             | 33                  | Various          | 0/0/2/0/0/0        |
| A39        | Winters BD      | Rapid-Response Systems as a Patient Safety Strategy A Systematic Review                                                                                          | USA                    | 6             | No                     | Perceived, role described    | Detailed         | No                  | 43                  | Various          | 0/0/0/0/0/0        |
| <b>BMJ</b> |                 |                                                                                                                                                                  |                        |               |                        |                              |                  |                     |                     |                  |                    |
| B1         | Aburto NJ       | Effect of lower sodium intake on health: systematic review and meta-analyses                                                                                     | Switzerland            | 6             | No                     | Perceived, role not reported | Detailed         | No                  | 77                  | Various          | 2/2/1/0/0/0        |
| B2°        | Aburto NJ       | Effect of increased potassium intake on cardiovascular risk factors and disease: systematic review and meta-analyses                                             | Switzerland            | 6             | No                     | Perceived, role not reported | Detailed         | No                  | 33                  | Various          | 2/2/1/0/0/0        |

|      | 1rst Author    | Title                                                                                                                                                                              | Country of affiliation | Nb co-authors | Protocol accessibility | Funding of the review        | COI of reviewers | Language limitation | Nb studies included | Designs examined | Procedure rating £ |
|------|----------------|------------------------------------------------------------------------------------------------------------------------------------------------------------------------------------|------------------------|---------------|------------------------|------------------------------|------------------|---------------------|---------------------|------------------|--------------------|
| B3°  | Aghajafari F   | Association between maternal serum 25-hydroxyvitamin D level and pregnancy and neonatal outcomes: systematic review and meta-analysis of observational studies                     | Canada                 | 6             | No                     | Perceived, no role           | None             | No                  | 31                  | 9                | 1/1/1/0/0/0        |
| B4°  | Azad MB        | Probiotic supplementation during pregnancy or infancy for the prevention of asthma and wheeze: systematic review and meta-analysis                                                 | Canada                 | 9             | Yes                    | None perceived               | None             | Not specified       | 20                  | RCTs only        | 1/2/1/2/0/0        |
| B5°  | Bermingham SL  | Intermittent self catheterisation with hydrophilic, gel reservoir, and non-coated catheters: a systematic review and cost effectiveness analysis                                   | UK                     | 6             | No                     | Perceived, role not reported | None             | English             | 8                   | RCTs only        | 0/2/0/0/0/0        |
| B6°  | Castellucci LA | Efficacy and safety outcomes of oral anticoagulants and antiplatelet drugs in the secondary prevention of venous thromboembolism: systematic review and network meta-analysis      | Canada                 | 10            | Yes                    | None perceived               | Detailed         | No                  | 12                  | RCTs only        | 0/2/0/0/0/0        |
| B7°  | Cipriani A     | Lithium in the prevention of suicide in mood disorders: updated systematic review and meta-analysis                                                                                | Italy                  | 4             | Yes                    | None perceived               | Detailed         | No                  | 48                  | RCTs only        | 1/2/1/0/0/0        |
| B8   | Downie A       | Red flags to screen for malignancy and fracture in patients with low back pain: systematic review                                                                                  | Australia              | 11            | No                     | None perceived               | None             | No                  | 14                  | Various          | 0/0/0/0/0/0        |
| B9°  | El-Khoury F    | The effect of fall prevention exercise programmes on fall induced injuries in community dwelling older adults: systematic review and meta-analysis of randomised controlled trials | France                 | 4             | No                     | None perceived               | None             | Other               | 17                  | RCTs only        | 1/2/1/0/0/0        |
| B10° | Gagne JJ       | Effect of smoking on comparative efficacy of antiplatelet agents: systematic review, meta-analysis, and indirect comparison                                                        | USA                    | 6             | No                     | Perceived, role not reported | None             | No                  | 9                   | RCTs only        | 1/0/1/0/0/0        |
| B11  | Gatta L        | Global eradication rates for Helicobacter pylori infection: systematic review and meta-analysis of sequential therapy                                                              | Italy                  | 4             | No                     | None perceived               | Detailed         | No                  | 46                  | RCTs only        | 1/2/0/0/0/0        |

|      | 1rst Author      | Title                                                                                                                                                         | Country of affiliation | Nb co-authors | Protocol accessibility | Funding of the review        | COI of reviewers | Language limitation | Nb studies included | Designs examined | Procedure rating £ |
|------|------------------|---------------------------------------------------------------------------------------------------------------------------------------------------------------|------------------------|---------------|------------------------|------------------------------|------------------|---------------------|---------------------|------------------|--------------------|
| B12° | Gloy VL          | Bariatric surgery versus non-surgical treatment for obesity: a systematic review and meta-analysis of randomised controlled trials                            | Switzerland            | 8             | Yes                    | None perceived               | Detailed         | No                  | 11                  | RCTs only        | 2/2/0/0/0/0        |
| B13° | Goto A           | Severe hypoglycaemia and cardiovascular disease: systematic review and meta-analysis with bias analysis                                                       | Japan                  | 5             | No                     | Perceived, no role           | None             | No                  | 6                   | Various          | 1/2/0/0/0/0        |
| B14° | Green R          | The effect of rising food prices on food consumption: systematic review with meta-regression                                                                  | UK                     | 7             | Yes                    | Perceived, no role           | None             | English             | 136                 | Various          | 1/0/2/0/0/0        |
| B15° | Haase N          | Hydroxyethyl starch 130/0.38-0.45 versus crystalloid or albumin in patients with sepsis: systematic review with meta-analysis and trial sequential analysis   | Denmark                | 7             | Yes                    | Not reported                 | Detailed         | No                  | 9                   | Various          | 1/2/0/2/0/0        |
| B16  | Haider BA        | Anaemia, prenatal iron use, and risk of adverse pregnancy outcomes: systematic review and meta-analysis                                                       | USA                    | 6             | No                     | Perceived, no role           | None             | No                  | 92                  | Various          | 1/2/1/0/0/0        |
| B17° | He FJ            | Effect of longer term modest salt reduction on blood pressure: Cochrane systematic review and meta-analysis of randomised trials                              | UK                     | 3             | No                     | None perceived               | Detailed         | No                  | 34                  | RCTs only        | 2/2/1/0/0/0        |
| B18° | Kramer CK        | Coronary artery calcium score prediction of all cause mortality and cardiovascular events in people with type 2 diabetes: systematic review and meta-analysis | Canada                 | 7             | Yes                    | Perceived, no role           | Detailed         | No                  | 8                   | Various          | 1/2/1/0/0/0        |
| B19§ | Kynaston-Pearson | Primary hip replacement prostheses and their evidence base: systematic review of literature                                                                   | UK                     | 12            | No                     | Perceived, role described    | Detailed         | Not specified       | 157                 | Various          | 1/2/0/0/0/0        |
| B20° | Langstrom N      | Preventing sexual abusers of children from reoffending: systematic review of medical and psychological interventions                                          | Sweden                 | 6             | No                     | Perceived, no role           | None             | Other               | 22                  | Various          | 0/1/1/0/1/0        |
| B21° | Lansbury L       | Interventions for non-metastatic squamous cell carcinoma of the skin: systematic review and pooled analysis of observational studies                          | UK                     | 5             | Yes                    | Perceived, role not reported | None             | English             | 118                 | Various          | 0/0/1/1/0/0        |

|      | 1rst Author  | Title                                                                                                                                                                                                 | Country of affiliation | Nb co-authors | Protocol accessibility | Funding of the review        | COI of reviewers | Language limitation | Nb studies included | Designs examined | Procedure rating £ |
|------|--------------|-------------------------------------------------------------------------------------------------------------------------------------------------------------------------------------------------------|------------------------|---------------|------------------------|------------------------------|------------------|---------------------|---------------------|------------------|--------------------|
| B22  | Lavigne E    | Breast cancer detection and survival among women with cosmetic breast implants: systematic review and meta-analysis of observational studies                                                          | Canada                 | 8             | No                     | Perceived, role not reported | None             | Other               | 22                  | Various          | 2/1/1/0/0/0        |
| B23° | Litton E     | Safety and efficacy of intravenous iron therapy in reducing requirement for allogeneic blood transfusion: systematic review and meta-analysis of randomised clinical trials                           | Australia              | 3             | No                     | None perceived               | Detailed**       | No                  | 75                  | RCTs only        | 2/2/1/0/0/0        |
| B24  | Mercier E    | Predictive value of S-100β protein for prognosis in patients with moderate and severe traumatic brain injury: systematic review and meta-analysis                                                     | Canada                 | 15            | No                     | Perceived, no role           | None             | No                  | 41                  | Various          | 2/2/1/0/0/0        |
| B25° | Mertz D      | Populations at risk for severe or complicated influenza illness: systematic review and meta-analysis                                                                                                  | Canada                 | 11            | No                     | Perceived, role not reported | Detailed         | Other               | 234                 | Various          | 1/1/1/0/0/0        |
| B26  | Myung SK     | Efficacy of vitamin and antioxidant supplements in prevention of cardiovascular disease: systematic review and meta-analysis of randomised controlled trials                                          | Korea                  | 7             | No                     | None perceived               | None             | No                  | 50                  | RCTs only        | 2/0/1/2/0/0        |
| B27° | Schmölzer GM | Non-invasive versus invasive respiratory support in preterm infants at birth: systematic review and meta-analysis                                                                                     | Canada                 | 6             | No                     | None perceived               | Detailed         | Not specified       | 4                   | RCTs only        | 2/0/1/0/0/1        |
| B28° | Schouten HJ  | Diagnostic accuracy of conventional or age adjusted D-dimer cut-off values in older patients with suspected venous thromboembolism: systematic review and meta-analysis                               | Netherlands            | 9             | No                     | Perceived, no role           | Detailed         | No                  | 13                  | Diagnostic only  | 1/2/1/0/0/0        |
| B29° | Schweizer M  | Effectiveness of a bundled intervention of decolonization and prophylaxis to decrease Gram positive surgical site infections after cardiac or orthopedic surgery: systematic review and meta-analysis | USA                    | 8             | No                     | Perceived, no role           | None             | English             | 39                  | Various          | 2/2/1/0/0/0        |

|                                                | 1rst Author   | Title                                                                                                                                                                           | Country of affiliation | Nb co-authors | Protocol accessibility | Funding of the review        | COI of reviewers | Language limitation | Nb studies included | Designs examined | Procedure rating £ |
|------------------------------------------------|---------------|---------------------------------------------------------------------------------------------------------------------------------------------------------------------------------|------------------------|---------------|------------------------|------------------------------|------------------|---------------------|---------------------|------------------|--------------------|
| B30                                            | Shaikh F      | Ultrasound imaging for lumbar punctures and epidural catheterisations: systematic review and meta-analysis                                                                      | Canada                 | 7             | No                     | Perceived, no role           | Detailed         | No                  | 14                  | RCTs only        | 1/2/1/0/0/0        |
| B31                                            | Stafford MR   | Early interventions to prevent psychosis: systematic review and meta-analysis                                                                                                   | UK                     | 5             | No                     | Perceived, role not reported | Detailed         | English             | 11                  | RCTs only        | 1/2/0/0/0/0        |
| B32                                            | Stegeman BH   | Different combined oral contraceptives and the risk of venous thrombosis: systematic review and network meta-analysis                                                           | UK                     | 7             | No                     | None perceived               | Detailed         | No                  | 25                  | Various          | 0/2/1/0/0/0        |
| B33°                                           | Ten Broek RPG | Burden of adhesions in abdominal and pelvic surgery: systematic review and met-analysis                                                                                         | Netherlands            | 9             | Yes                    | None perceived               | None             | No                  | 196                 | Various          | 1/0/1/0/0/0        |
| B34°                                           | Thompson M    | Duration of symptoms of respiratory tract infections in children: systematic review                                                                                             | USA                    | 6             | No                     | Perceived, no role           | None             | English             | 48                  | Various          | 0/2/1/0/0/0        |
| B35°                                           | Threapleton   | Dietary fibre intake and risk of cardiovascular disease: systematic review and meta-analysis                                                                                    | UK                     | 9             | No                     | Perceived, no role           | Detailed         | English             | 22                  | Cohort only      | 1/0/1/0/0/0        |
| B36°                                           | Uthman OA     | Exercise for lower limb osteoarthritis: systematic review incorporating trial sequential analysis and network meta-analysis                                                     | UK                     | 7             | Yes                    | Perceived, no role           | Detailed**       | No                  | 60                  | RCTs only        | 0/2/1/0/0/0        |
| B37°                                           | Virtanen M    | Perceived job insecurity as a risk factor for incident coronary heart disease: systematic review and meta-analysis                                                              | Finland                | 47            | No                     | Perceived, no role           | Detailed         | English             | 17                  | Cohort only      | 1/2/0/0/0/1        |
| B38°                                           | Wu HY         | Comparative effectiveness of renin-angiotensin system blockers and other antihypertensive drugs in patients with diabetes: systematic review and bayesian network meta-analysis | Taiwan                 | 9             | Yes                    | None perceived               | None             | No                  | 63                  | RCTs only        | 1/1/1/0/0/0        |
| <b>Cochrane Database of Systematic Reviews</b> |               |                                                                                                                                                                                 |                        |               |                        |                              |                  |                     |                     |                  |                    |
| C1                                             | Arguedas JA   | Blood pressure targets for hypertension in people with diabetes mellitus                                                                                                        | Costa Rica             | 3             | Yes                    | Perceived, role described    | None             | No                  | 5                   | RCTs only        | 0/2/2/1/0/0        |
| C2                                             | Brown R       | Aripiprazole alone or in combination for acute mania                                                                                                                            | UK                     | 3             | Yes                    | Perceived, role not reported | Detailed         | No                  | 10                  | RCTs only        | 1/2/0/1/0/0        |
| C3°                                            | Chen N        | Cerebrolysin for vascular dementia                                                                                                                                              | China                  | 6             | Yes                    | Not reported                 | None             | No                  | 6                   | RCTs only        | 1/2/0/0/0/0        |



|      | 1rst Author | Title                                                                                                                                                                              | Country of affiliation | Nb co-authors | Protocol accessibility | Funding of the review        | COI of reviewers | Language limitation | Nb studies included | Designs examined | Procedure rating £ |
|------|-------------|------------------------------------------------------------------------------------------------------------------------------------------------------------------------------------|------------------------|---------------|------------------------|------------------------------|------------------|---------------------|---------------------|------------------|--------------------|
| C4°  | Cheng LM    | Pedicle screw fixation for traumatic fractures of the thoracic and lumbar spine                                                                                                    | China                  | 7             | Yes                    | Perceived, role not reported | None             | No                  | 8                   | RCTs only        | 1/2/2/0/0/0        |
| C5   | Foster C    | Remote and web 2.0 interventions for promoting physical activity                                                                                                                   | UK                     | 4             | Yes*                   | Perceived, role not reported | Detailed         | No                  | 11                  | RCTs only        | 2/2/1/0/0/0        |
| C6°  | Gois PHF    | Pharmacotherapy for hyperuricemia in hypertensive patients                                                                                                                         | Brasil                 | 2             | Yes                    | Perceived, role not reported | None             | No                  | 1                   | RCTs only        | 1/2/2/0/0/0        |
| C7   | Gower EW    | Perioperative antibiotics for prevention of acute endophthalmitis after cataract surgery                                                                                           | USA                    | 5             | Yes                    | Perceived, role not reported | None             | No                  | 4                   | RCTs only        | 1/2/0/1/0/0        |
| C8°  | Hunot V     | 'Third wave' cognitive and behavioural therapies versus other psychological therapies for depression                                                                               | UK                     | 10            | Yes                    | Perceived, role not reported | Detailed         | No                  | 3                   | RCTs only        | 2/2/1/0/1/0        |
| C9   | Lawrie TA   | Pegylated liposomal doxorubicin for relapsed epithelial ovarian cancer                                                                                                             | UK                     | 5             | Yes                    | None perceived               | None             | No                  | 14                  | RCTs only        | 1/2/0/1/0/0        |
| C10° | Moore ZEH   | Dressings and topical agents for preventing pressure ulcers                                                                                                                        | Ireland                | 2             | Yes                    | Perceived, role not reported | Detailed         | No                  | 9                   | RCTs only        | 1/2/1/1/0/2        |
| C11° | Morris R    | Training to recognise the early signs of recurrence in schizophrenia                                                                                                               | UK                     | 5             | Yes                    | Perceived, role not reported | None             | Not specified       | 34                  | RCTs only        | 2/2/1/1/0/0        |
| C12  | Neumann I   | Comparison of different regimens of proton pump inhibitors for acute peptic ulcer bleeding                                                                                         | Chile                  | 8             | Yes                    | Perceived, role not reported | Detailed         | No                  | 22                  | RCTs only        | 2/2/2/0/0/0        |
| C13  | O'Meara S   | Foam dressings for venous leg ulcers                                                                                                                                               | UK                     | 2             | Yes                    | Perceived, role not reported | None             | No                  | 12                  | RCTs only        | 2/2/1/1/0/0        |
| C14° | Riaz Y      | Manual small incision cataract surgery (MSICS) with posterior chamber intraocular lens versus phacoemulsification with posterior chamber intraocular lens for age-related cataract | UK                     | 3             | Yes                    | Perceived, role not reported | None             | No                  | 8                   | RCTs only        | 1/2/1/1/1/0        |
| C15  | Suttajit S  | Quetiapine versus typical antipsychotic medications for schizophrenia                                                                                                              | Thailand               | 6             | Yes                    | Perceived, role not reported | Detailed         | No                  | 43                  | RCTs only        | 1/1/0/1/0/0        |

|             | 1rst Author | Title                                                                                                                                                                                           | Country of affiliation | Nb co-authors | Protocol accessibility | Funding of the review        | COI of reviewers | Language limitation | Nb studies included | Designs examined | Procedure rating £ |
|-------------|-------------|-------------------------------------------------------------------------------------------------------------------------------------------------------------------------------------------------|------------------------|---------------|------------------------|------------------------------|------------------|---------------------|---------------------|------------------|--------------------|
| C16°        | Teixeira DM | Regular (ICSI) versus ultra-high magnification (IMSI) sperm selection for assisted reproduction                                                                                                 | Brasil                 | 7             | Yes                    | Perceived, role not reported | None             | No                  | 9                   | RCTs only        | 2/2/1/1/0/0        |
| C17°        | Thompson DR | Wound drainage after axillary dissection for carcinoma of the breast                                                                                                                            | UK                     | 3             | Yes                    | None perceived               | None             | No                  | 7                   | RCTs only        | 1/2/0/1/0/0        |
| C18°        | Wong T      | Combined and alternating paracetamol and ibuprofen therapy for febrile children                                                                                                                 | Canada                 | 7             | Yes*                   | Perceived, role described    | None             | No                  | 6                   | RCTs only        | 1/2/1/1/0/0        |
| C19°        | Yonemoto N  | Schedules for home visits in the early postpartum period                                                                                                                                        | Japan                  | 4             | Yes                    | Perceived, role not reported | None             | No                  | 12                  | RCTs only        | 1/0/1/0/0/0        |
| <b>JAMA</b> |             |                                                                                                                                                                                                 |                        |               |                        |                              |                  |                     |                     |                  |                    |
| J1°         | Crochet JR  | Does This Woman Have an Ectopic Pregnancy? The Rational Clinical Examination Systematic Review                                                                                                  | USA                    | 3             | No                     | Not reported                 | None             | English             | 14                  | Cohort only      | 0/0/0/0/0/0        |
| J2°         | Deb S       | Coronary Artery Bypass Graft Surgery vs Percutaneous Interventions in Coronary Revascularization A Systematic Review                                                                            | Canada                 | 6             | No                     | Perceived, no role           | None             | Not specified       | 18                  | Various          | 0/0/2/0/0/0        |
| J3°         | Flegal KM   | Association of All-Cause Mortality With Overweight and Obesity Using Standard Body Mass Index Categories A Systematic Review and Meta-analysis                                                  | USA                    | 4             | No                     | None perceived               | None             | No                  | 97                  | Cohort only      | 0/1/0/0/0/0        |
| J4°         | Hermans J   | Does This Patient With Shoulder Pain Have Rotator Cuff Disease? The Rational Clinical Examination Systematic Review                                                                             | Netherlands            | 6             | No                     | Not reported                 | Detailed         | Other               | 28                  | Diagnostic only  | 0/2/0/0/0/0        |
| J5°         | Hollands H  | Do Findings on Routine Examination Identify Patients at Risk for Primary Open-Angle Glaucoma? The Rational Clinical Examination Systematic Review                                               | Canada                 | 6             | No                     | Not reported                 | Detailed         | English             | 57                  | Diagnostic only  | 0/0/1/0/0/0        |
| J6°         | Kayentao K  | Intermittent Preventive Therapy for Malaria During Pregnancy Using 2 vs 3 or More Doses of Sulfadoxine-Pyrimethamine and Risk of Low Birth Weight in Africa Systematic Review and Meta-analysis | UK                     | 11            | No                     | Perceived, no role           | Detailed         | No                  | 7                   | RCTs only        | 2/2/1/0/0/0        |

|                   | 1rst Author    | Title                                                                                                                                                                                    | Country of affiliation | Nb co-authors | Protocol accessibility | Funding of the review        | COI of reviewers | Language limitation | Nb studies included | Designs examined | Procedure rating £ |
|-------------------|----------------|------------------------------------------------------------------------------------------------------------------------------------------------------------------------------------------|------------------------|---------------|------------------------|------------------------------|------------------|---------------------|---------------------|------------------|--------------------|
| J7°               | Lin SY         | Sublingual Immunotherapy for the Treatment of Allergic Rhinoconjunctivitis and Asthma A Systematic Review                                                                                | USA                    | 7             | Yes*                   | Perceived, role described    | Detailed         | English             | 63                  | RCTs only        | 1/0/1/1/0/0        |
| J8                | Maggard_Gibbon | Bariatric Surgery for Weight Loss and Glycemic Control in Nonmorbidly Obese Adults With Diabetes. A Systematic Review                                                                    | USA                    | 8             | No                     | Perceived, role described    | Detailed         | Not specified       | 60                  | Various          | 0/2/0/0/0/0        |
| J9°               | Myers KA       | Does This Patient Have Obstructive Sleep Apnea? The Rational Clinical Examination Systematic Review                                                                                      | Canada                 | 3             | No                     | Not reported                 | None             | English             | 42                  | Diagnostic only  | 0/1/2/0/0/0        |
| J10°              | North CS       | Mental Health Response to Community Disasters A Systematic Review                                                                                                                        | USA                    | 2             | No                     | Perceived, role not reported | Detailed         | English             | 222                 | Various          | 0/0/0/0/0/-        |
| J11               | Rao R          | Axillary Node Interventions in Breast Cancer. A Systematic Review                                                                                                                        | USA                    | 4             | No                     | Not reported                 | Detailed         | English             | 17                  | Various          | 0/0/0/0/0/0        |
| J12°              | Zarychanski    | Association of Hydroxyethyl Starch Administration With Mortality and Acute Kidney Injury in Critically Ill Patients Requiring Volume Resuscitation A Systematic Review and Meta-analysis | Canada                 | 7             | Yes                    | Not reported                 | Detailed         | No                  | 38                  | RCTs only        | 2/1/1/0/2/0        |
| <b>The Lancet</b> |                |                                                                                                                                                                                          |                        |               |                        |                              |                  |                     |                     |                  |                    |
| L1°               | Chan KY        | Epidemiology of Alzheimer's disease and other forms of dementia in China, 1990–2010: a systematic review and analysis                                                                    | Australia              | 12            | No                     | Perceived, no role           | None             | Other               | 89                  | Various          | 0/1/1/0/0/0        |
| L2°               | Chopra V       | Risk of venous thromboembolism associated with peripherally inserted central catheters: a systematic review and meta-analysis                                                            | USA                    | 7             | No                     | None perceived               | None             | No                  | 64                  | Various          | 2/2/1/0/0/0        |
| L3°               | Fowkes FGR     | Comparison of global estimates of prevalence and risk factors for peripheral artery disease in 2000 and 2010: a systematic review and analysis                                           | UK                     | 11            | No                     | Perceived, no role           | Detailed         | Not specified       | 34                  | Various          | 0/2/0/0/0/0        |
| L4                | Jamal SA       | Effect of calcium-based versus non-calcium-based phosphate binders on mortality in patients with chronic kidney disease: an updated systematic review and meta-analysis                  | Canada                 | 9             | No                     | None perceived               | Detailed         | No                  | 8                   | Various          | 1/1/0/0/0/0        |

|      | 1rst Author   | Title                                                                                                                                                              | Country of affiliation | Nb co-authors | Protocol accessibility | Funding of the review        | COI of reviewers | Language limitation | Nb studies included | Designs examined | Procedure rating £ |
|------|---------------|--------------------------------------------------------------------------------------------------------------------------------------------------------------------|------------------------|---------------|------------------------|------------------------------|------------------|---------------------|---------------------|------------------|--------------------|
| L5°  | Prost A       | Women's groups practising participatory learning and action to improve maternal and newborn health in low-resource settings: a systematic review and meta-analysis | UK                     | 28            | No                     | Perceived, no role           | Detailed         | No                  | 7                   | RCTs only        | 2/1/1/0/0/0        |
| L6°  | Shah ASV      | Global association of air pollution and heart failure: a systematic review and meta-analysis                                                                       | UK                     | 8             | No                     | Perceived, no role           | None             | No                  | 35                  | Various          | 1/2/1/0/0/0        |
| L7°  | Stöckl H      | The global prevalence of intimate partner homicide: a systematic review                                                                                            | UK                     | 7             | No                     | Perceived, no role           | None             | Not specified       | 163                 | Various          | 0/0/0/0/0/-        |
| L8°  | Ten Broek RPG | Benefits and harms of adhesion barriers for abdominal surgery: a systematic review and meta-analysis                                                               | Netherlands            | 6             | Yes                    | None perceived               | None             | No                  | 28                  | RCTs only        | 2/0/1/2/0/0        |
| L9°  | Tustung LS    | Socioeconomic development as an intervention against malaria: a systematic review and meta-analysis                                                                | UK                     | 7             | No                     | Perceived, role not reported | None             | English             | 20                  | Various          | 1/0/1/0/0/0        |
| L10° | Wong E        | Diabetes and risk of physical disability in adults: a systematic review and meta-analysis                                                                          | Australia              | 7             | Yes                    | Perceived, no role           | None             | English             | 26                  | Various          | 1/2/1/0/0/0        |

COI: Conflict of Interest; RCT: Randomised Controlled Trials; £: Scoring of the 6 procedures applied (search for unpublished trials/contact with study authors/ search for duplicates/study sponsor/study author's COI/ethical approval) 0 = procedure not applied, 1 = partially applied, 2 = fully applied; \*: Protocol not freely accessible; \*\*: Detailed in supplementary files or online only; °: author answered our query; §: author not contacted

**Appendix Table 2A.** Characteristics of included systematic reviews according to journal of publication

|                                                        | <b>Journal</b>     |               |               |               |                 | <b>P-value</b> |           |
|--------------------------------------------------------|--------------------|---------------|---------------|---------------|-----------------|----------------|-----------|
|                                                        | <b>Ann Int Med</b> | <b>BMJ</b>    | <b>JAMA</b>   | <b>Lancet</b> | <b>Cochrane</b> | <b>p1</b>      | <b>p2</b> |
|                                                        | <b>n %</b>         | <b>n %</b>    | <b>n %</b>    | <b>n %</b>    | <b>n %</b>      |                |           |
| <b>Number of systematic reviews</b>                    | 39 33%             | 38 32%        | 12 10%        | 10 8%         | 19 16%          |                |           |
| <b>Answered inquiry</b>                                | 23 59%             | 27 71%        | 10 83%        | 9 90%         | 11 58%          | 0.198          | 0.313     |
| <b>Number of co-authors</b>                            |                    |               |               |               |                 | 0.001          | 0.012     |
| Median (IQR)                                           | 6 (4 to 8)         | 7 (6 to 9)    | 6 (3.5 to 7)  | 7.5 (7 to 11) | 5 (3 to 7)      |                |           |
| <b>Country of affiliation of 1<sup>st</sup> author</b> |                    |               |               |               |                 | <0.001         | <0.001    |
| USA                                                    | 30 77%             | 4 11%         | 6 50%         | 1 10%         | 1 5%            |                |           |
| UK                                                     | 0 0%               | 9 24%         | 1 8%          | 5 50%         | 8 42%           |                |           |
| Canada                                                 | 6 15%              | 9 24%         | 4 33%         | 1 10%         | 1 5%            |                |           |
| Australia                                              | 0 0%               | 2 5%          | 0 0%          | 2 20%         | 0 0%            |                |           |
| Others                                                 | 3 8%               | 14 37%        | 1 8%          | 1 10%         | 9 47%           |                |           |
| <b>Protocol registration/accessibility</b>             |                    |               |               |               |                 | <0.001         | 0.014     |
| No mention of protocol                                 | 37 95%             | 27 71%        | 10 83%        | 8 80%         | 0 0%            |                |           |
| Protocol exists/ not freely accessible                 | 0 0%               | 0 0%          | 1 8%          | 0 0%          | 2 11%           |                |           |
| Protocol exists/ freely accessible                     | 2 5%               | 11 29%        | 1 8%          | 2 20%         | 17 89%          |                |           |
| <b>Source of funding of systematic review</b>          |                    |               |               |               |                 | <0.001         | <0.001    |
| Not reported                                           | 0 0%               | 1 3%          | 6 50%         | 0 0%          | 1 5%            |                |           |
| Reported that no funding was received                  | 4 10%              | 14 37%        | 1 8%          | 3 30%         | 2 11%           |                |           |
| Reported that funding was received with details        | 35 90%             | 23 61%        | 5 42%         | 7 70%         | 16 84%          |                |           |
| <b>Conflicts of interests of systematic reviewers</b>  |                    |               |               |               |                 | <0.001         | <0.001    |
| Not reported                                           | 0 0%               | 0 0%          | 0 0%          | 0 0%          | 0 0%            |                |           |
| Reported that there were none                          | 0 0%               | 18 47%        | 4 33%         | 7 70%         | 13 68%          |                |           |
| Reported and detailed in the published report          | 26 67%             | 18 47%        | 8 67%         | 3 30%         | 6 32%           |                |           |
| Reported elsewhere (e.g, online)                       | 13 33%             | 2 5%          | 0 0%          | 0 0%          | 0 0%            |                |           |
| <b>Number of databases searched</b>                    |                    |               |               |               |                 | 0.002          | 0.167     |
| Median (IQR)                                           | 4 (3 to 5)         | 4 (3 to 7)    | 3 (2 to 5.5)  | 5 (4 to 7)    | 7 (6 to 9)      |                |           |
| <b>Language limitations applied</b>                    |                    |               |               |               |                 | <0.001         | 0.004     |
| None                                                   | 7 18%              | 23 61%        | 3 25%         | 5 50%         | 18 95%          |                |           |
| English only                                           | 26 67%             | 8 21%         | 6 50%         | 2 20%         | 0 0%            |                |           |
| Limitations to other languages                         | 1 3%               | 4 11%         | 1 8%          | 1 10%         | 0 0%            |                |           |
| Not specified                                          | 5 13%              | 3 8%          | 2 17%         | 2 20%         | 1 5%            |                |           |
| <b>Number of studies included</b>                      |                    |               |               |               |                 | 0.001          | 0.571     |
| Median (IQR)                                           | 46 (18 to 60)      | 28 (13 to 60) | 40 (17 to 61) | 31 (20 to 64) | 9 (6 to 12)     |                |           |
| <b>Study designs examined</b>                          |                    |               |               |               |                 | <0.001         | 0.003     |
| RCT only                                               | 6 15%              | 16 42%        | 3 25%         | 2 20%         | 19 100%         |                |           |
| Cohort prospective only                                | 1 3%               | 2 5%          | 2 17%         | 0 0%          | 0 0%            |                |           |
| Diagnostic studies only                                | 1 3%               | 1 3%          | 3 25%         | 0 0%          | 0 0%            |                |           |
| Various designs                                        | 31 79%             | 19 50%        | 4 33%         | 8 80%         | 0 0%            |                |           |

IQR: Inter-quartile range; RCT: Randomised controlled trials; P1: tests the null hypothesis of equal distribution across the five journals. P2: tests the null hypothesis of equal distribution across the four journals, excluding the Cochrane Database of Systematic Reviews. Statistical tests: Chi2 test or Kruskal-Wallis equality of population rank tests, as appropriate.

| Study sponsors' biases                                             |                                                                                                                                                                                                                                                                                                                                                                                                                                                                                                                                                                                                                                                           |
|--------------------------------------------------------------------|-----------------------------------------------------------------------------------------------------------------------------------------------------------------------------------------------------------------------------------------------------------------------------------------------------------------------------------------------------------------------------------------------------------------------------------------------------------------------------------------------------------------------------------------------------------------------------------------------------------------------------------------------------------|
| Not present                                                        | <p>Use of probiotic supplementation during pregnancy or infancy for the prevention of asthma. Nineteen of 20 trials were to some degree sponsored by industry. However, subgroup analyses did not identify significant sponsor bias.<sup>B4</sup></p> <p>Use of hydroxyethyl starch solutions in patients with sepsis. Sensitivity analyses excluding industry-sponsored trials did not identify sponsor bias.<sup>B15</sup></p> <p>Use of hydroxyethyl starch solutions in critically ill patients. Sensitivity analyses excluding industry-sponsored trials did not identify sponsor bias.<sup>J12</sup></p>                                            |
| Unlikely                                                           | <p>Adhesion barriers for abdominal surgery. Authors reported that most trials were sponsored by industry, but sponsor-bias seemed unlikely since investigator-driven trials compared favourably with industry-sponsored trials.<sup>L8</sup></p>                                                                                                                                                                                                                                                                                                                                                                                                          |
| Present                                                            | <p>Effects of vitamins E and B6 on myocardial infarction and cardiovascular death. Beneficial effects were found only in trials in which the vitamins were supplied by the pharmaceutical industry.<sup>B26</sup></p> <p>Association between combined oral contraceptives and the risk of venous thrombosis. <i>«The risk estimate for third generation users (compared with non-users) was lower in industry sponsored studies than in non-industry sponsored studies (relative risk 1.9 v 5.2)». «All risk estimates were higher in studies with objectively confirmed venous thrombosis, of which none were industry sponsored».</i><sup>B32</sup></p> |
| Ethical approval of included studies                               |                                                                                                                                                                                                                                                                                                                                                                                                                                                                                                                                                                                                                                                           |
| Identified studies for which ethics and consent were not available | <p>Prevention of pressure ulcer. <i>«No information about ethics approval or participant consent was provided by Green 1974, Han 2011, Kalowes 2012, Qiuli 2010 or Van Der Cammen 1987. Although Smith 1985 had ethics approval, it was not reported whether participants consented. Information on ethics and consent for the remaining studies was not available (Houwing 2008; Nakagami 2007; Torra i Bou 2005)».</i><sup>C10</sup></p>                                                                                                                                                                                                                |
| Acknowledged that all studies had received ethical approval        | <p>Perceived job insecurity as a risk factor for incident coronary heart disease. <i>«Each constituent study in the consortium was approved by the relevant local or national ethics committee and all participants gave informed consent to participate».</i><sup>B37</sup></p> <p>Non-invasive versus invasive respiratory support in preterm infants at birth. <i>«All the studies required antenatal consent, preselecting more stable pregnancies and lowering the observed incidence of acute or serious antenatal and neonatal complications».</i><sup>B27</sup></p>                                                                               |

**Appendix Table 3A:** Details on study sponsors' and ethical approval of included studies. Texts in italic are cited from the original references.

**Appendix Table 4A.** Application of procedures protecting from research malpractice, according to journal of publication

|                                                                      | <b>Journal</b>     |            |                |               |                 | <b>P-value</b> |           |
|----------------------------------------------------------------------|--------------------|------------|----------------|---------------|-----------------|----------------|-----------|
|                                                                      | <b>Ann Int Med</b> | <b>BMJ</b> | <b>JAMA</b>    | <b>Lancet</b> | <b>Cochrane</b> | <b>p1</b>      | <b>p2</b> |
|                                                                      | <b>n %</b>         | <b>n %</b> | <b>n %</b>     | <b>n %</b>    | <b>n %</b>      |                |           |
| <b>Number of systematic reviews</b>                                  | 39 33%             | 38 32%     | 12 10%         | 10 8%         | 19 16%          |                |           |
| <b>Search of unpublished trials and/or test for publication bias</b> |                    |            |                |               |                 | 0.001          | 0.005     |
| Publication bias discussed only or not mentioned                     | 18 46%             | 8 21%      | 9 75%          | 3 30%         | 1 5%            |                |           |
| Unpublished trials searched OR publication bias tested               | 19 49%             | 20 53%     | 1 8%           | 4 40%         | 12 63%          |                |           |
| Unpublished trials searched AND publication bias tested              | 2 5%               | 10 26%     | 2 17%          | 3 30%         | 6 32%           |                |           |
| <b>Contact with authors of the studies</b>                           |                    |            |                |               |                 | <0.001         | 0.001     |
| Study authors not contacted                                          | 27 69%             | 8 21%      | 6 50%          | 3 30%         | 1 5%            |                |           |
| Study authors contacted for method or unspecified reason             | 3 8%               | 5 13%      | 3 25%          | 3 30%         | 1 5%            |                |           |
| Study authors contacted to identify unreported outcomes              | 9 23%              | 25 66%     | 3 25%          | 4 40%         | 17 89%          |                |           |
| <b>Duplicate publications</b>                                        |                    |            |                |               |                 | 0.092          | 0.106     |
| Not searched or not mentioned                                        | 12 31%             | 10 26%     | 6 50%          | 3 30%         | 6 32%           |                |           |
| Searched and found, not referenced OR no mention of results          | 23 59%             | 28 74%     | 4 33%          | 7 70%         | 9 47%           |                |           |
| Searched, found and referenced                                       | 4 10%              | 0 0%       | 2 17%          | 0 0%          | 4 21%           |                |           |
| <b>Sponsors of the studies</b>                                       |                    |            |                |               |                 | <0.001         | 0.121     |
| Not mentioned                                                        | 32 82%             | 33 87%     | 10 83%         | 9 90%         | 7 37%           |                |           |
| Yes, extracted                                                       | 7 18%              | 1 3%       | 1 8%           | 0 0%          | 12 63%          |                |           |
| Yes, extracted and subgroup analyses performed                       | 0 0%               | 4 11%      | 1 8%           | 1 10%         | 0 0%            |                |           |
| <b>Conflicts of interests of study authors</b>                       |                    |            |                |               |                 | 0.500          | 0.731     |
| Not mentioned                                                        | 37 95%             | 37 97%     | 12 100%        | 10 100%       | 17 89%          |                |           |
| Yes, extracted                                                       | 2 5%               | 1 3%       | 0 0%           | 0 0%          | 2 11%           |                |           |
| Yes, extracted and subgroup analyses performed                       | 0 0%               | 0 0%       | 0 0%           | 0 0%          | 0 0%            |                |           |
| <b>Ethical approval of included studies</b>                          |                    |            |                |               |                 | 0.510          | 0.351     |
| Not mentioned                                                        | 39 100%            | 36 95%     | 12 100%        | 10 100%       | 18 95%          |                |           |
| Yes, extracted                                                       | 0 0%               | 2 5%       | 0 0%           | 0 0%          | 1 5%            |                |           |
| Yes, extracted and analysed                                          | 0 0%               | 0 0%       | 0 0%           | 0 0%          | 0 0%            |                |           |
| <b>Number of procedures applied</b>                                  |                    |            |                |               |                 | <0.001         | 0.021     |
| None                                                                 | 6 15%              | 1 3%       | 3 25%          | 1 10%         | 0 0%            |                |           |
| 1 or 2 procedures                                                    | 22 56%             | 14 37%     | 6 50%          | 4 40%         | 2 11%           |                |           |
| 3 or 4 procedures                                                    | 10 26%             | 23 61%     | 3 25%          | 5 50%         | 15 79%          |                |           |
| 5 procedures                                                         | 1 3%               | 0 0%       | 0 0%           | 0 0%          | 2 11%           |                |           |
| Median (IQR)                                                         | 2 (1 to 3)         | 3 (2 to 3) | 1 (0.5 to 2.5) | 2.5 (2 to 3)  | 3 (3 to 4)      |                |           |
| <b>Explicit mention of misconduct by review authors</b>              |                    |            |                |               |                 | 0.461          | 0.318     |
| No, or not mentioned                                                 | 38 97%             | 36 95%     | 10 83%         | 9 90%         | 18 95%          |                |           |
| Yes                                                                  | 1 3%               | 2 5%       | 2 17%          | 1 10%         | 1 5%            |                |           |

IQR: Inter-quartile range. P1: tests the null hypothesis of equal distribution across the five journals. P2: tests the null hypothesis of equal distribution across the four journals, excluding the Cochrane Database of Systematic Reviews. (Chi2 test)
